# Supplementary material for: An experimental study on the Co–C3N4/BiPO4 composite for efficient photocatalytic water splitting
Source: Royal Society of Chemistry journal article supplement (doi:10.1039/d0nj01329c), 2020-01-01
Supplement: d0nj01329c1.pdf [file d0nj01329c1.pdf]

Experimental study on Co-C<sub>3</sub>N<sub>4</sub>/BiPO<sub>4</sub> composite for efficient photocatalytic water  
splitting

Xuecheng Liu<sup>1\*</sup>, Linjie Yan<sup>1</sup>, Linxin He<sup>1</sup>, Zurun Yao<sup>1</sup>, Linfeng You<sup>1</sup>, Lin Liu<sup>2</sup>,  
Guilin Zhou<sup>1</sup>, Hongyu Huang<sup>2</sup>

<sup>1</sup>Chongqing Key Laboratory of Catalysis and New Environmental Materials, College  
of Environment and Resources, Chongqing Technology and Business University,  
Chongqing 400067, China.

<sup>2</sup>Guangdong Provincial Key Laboratory of New and Renewable Energy Research and  
Development, Guangzhou Institute of Energy Conversion, Chinese Academy of  
Sciences, Guangzhou 510640, China.

\*Correspondence:

Xuecheng Liu (E-mail: [liuxc@ctbu.edu.cn](mailto:liuxc@ctbu.edu.cn))

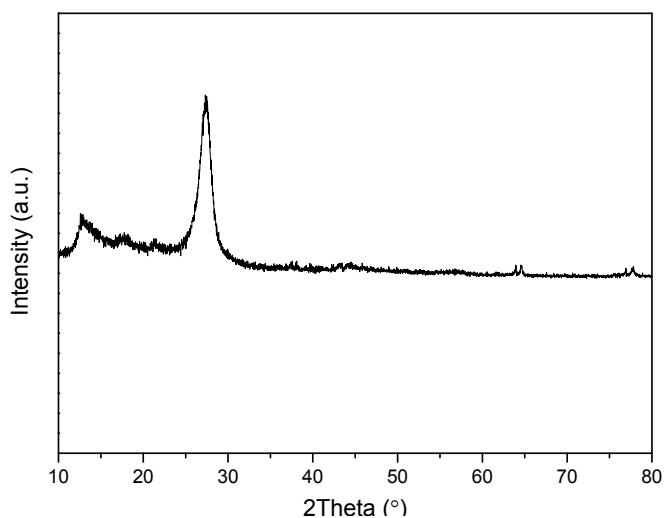

Figure S1 XRD pattern of g-C<sub>3</sub>N<sub>4</sub>

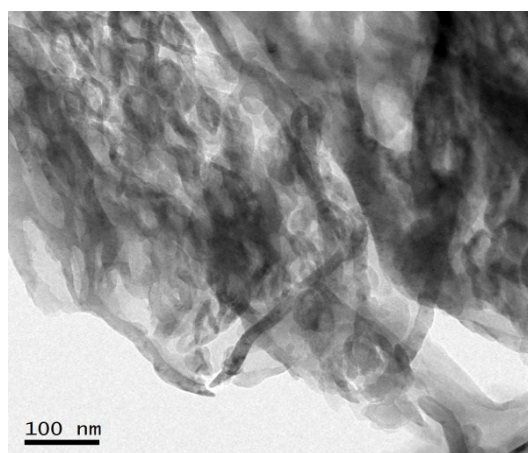

Figure S2 TEM image of fresh  $g\text{-C}_3\text{N}_4$

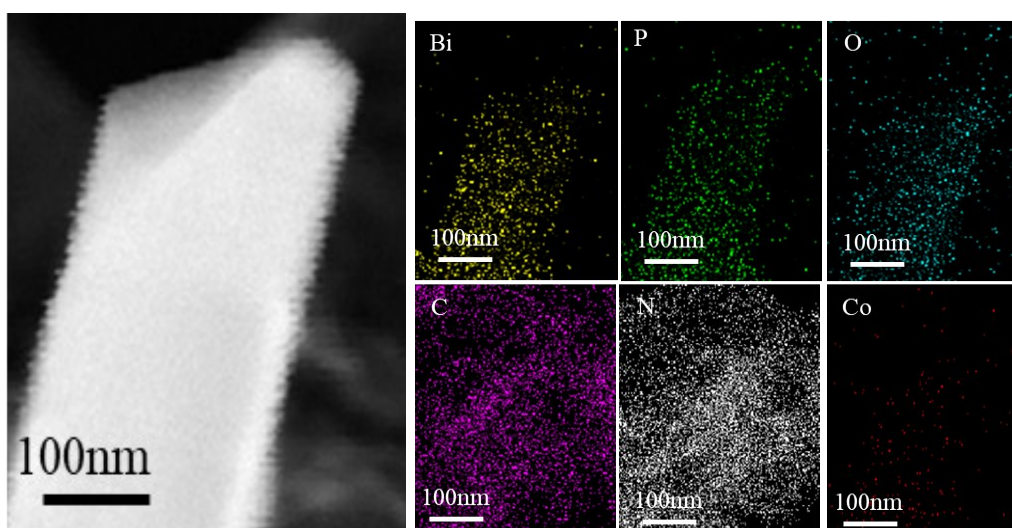

Figure S3 The EDS mapping images of 5-Co-CN/BP composite.

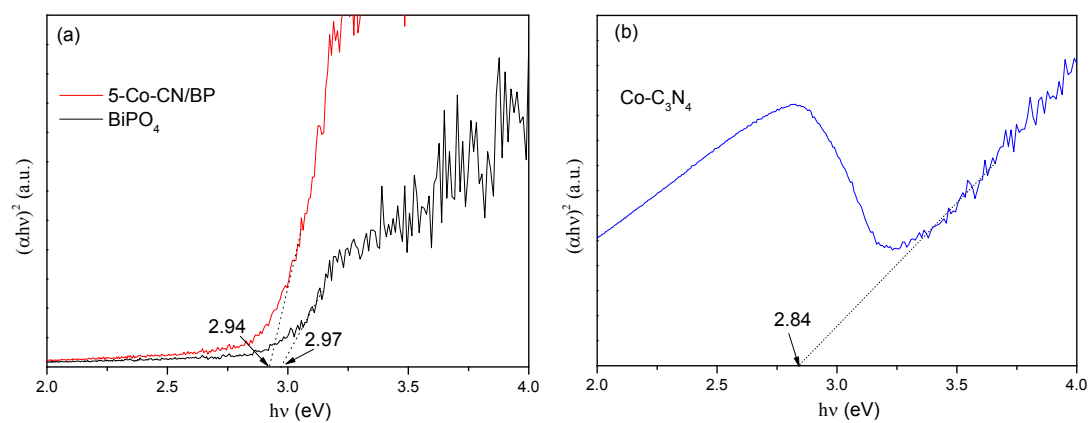

Figure S4 Plots of  $(\alpha h\nu)^2$  versus photon energy ( $h\nu$ ) for the band gap energies of (a)  $\text{BiPO}_4$ , 5-Co-CN/BP and (b)  $\text{Co-C}_3\text{N}_4$ .

Table S1. Atomic relative content (%) of prepared samples from XPS characterization

| Sample | C <sub>3</sub> N <sub>4</sub> | Co-C <sub>3</sub> N <sub>4</sub> | 5-Co-CN/BP | 10-Co-CN/BP | BiPO <sub>4</sub> |
|--------|-------------------------------|----------------------------------|------------|-------------|-------------------|
| N      | 52.66                         | 50.43                            | 7.65       | 15.99       | -                 |
| C      | 44.28                         | 46.27                            | 24.59      | 24.91       | -                 |
| O      | 3.05                          | 2.31                             | 47.03      | 40.35       | 68.36             |
| Co     | -                             | 0.99                             | 0.15       | 0.35        | -                 |
| P      | -                             | -                                | 12.13      | 10.70       | 18.56             |
| Bi     | -                             | -                                | 8.45       | 7.70        | 13.08             |

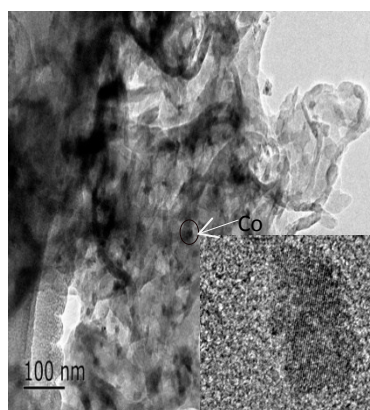

Figure S5 HRTEM image of Co-C<sub>3</sub>N<sub>4</sub>
